# Supplementary material
Source: publisher site journal article supplement (https://www.dovepress.com/article/561817)
Supplement: Supplementary file 1 [file 561817%20Revised%20Supplementary%20Table%20S1.docx]

Supplementary Table 1. Full descriptive statistics and group comparisons of coping strategies according to anxiety, depression, disease impact, and dyspnea severity

| Grouping variable | Category | n | Mean ± SD / Median (IQR) | Test statistic (df) | p-value | Effect size (η² / ε²) | Post-hoc differences |
| --- | --- | --- | --- | --- | --- | --- | --- |
| HADS-A – Avoidant coping | Normal | 62 | 20.0 (19.0–21.0) | KW χ²(2)=0.298 | 0.858 | ε² = 0.003 |  |
|  | Borderline | 22 | 20.5 (19.0–21.0) |  |  |  |  |
|  | Abnormal | 9 | 20.0 (19.0–23.0) |  |  |  |  |
| HADS-A – Emotion-focused coping | Normal | 62 | 25.0 (24.0–28.0) | KW χ²(2)=5.375 | 0.066 | ε² = 0.058 |  |
|  | Borderline | 22 | 24.0 (22.0–26.0) |  |  |  |  |
|  | Abnormal | 9 | 24.0 (20.75–25.25) |  |  |  |  |
| HADS-A – Problem-focused coping | Normal | 62 | 28.5 (27.0–32.0) | KW χ²(2)=5.081 | 0.076 | ε² = 0.055 |  |
|  | Borderline | 22 | 28.0 (26.0–29.0) |  |  |  |  |
|  | Abnormal | 9 | 27.0 (25.75–27.5) |  |  |  |  |
| HADS-D – Avoidant coping | Normal | 62 | 20.0 (19.0–21.0) | KW χ²(2)=0.298 | 0.858 | ε² = 0.003 |  |
|  | Borderline | 22 | 20.5 (19.0–21.0) |  |  |  |  |
|  | Abnormal | 9 | 20.0 (19.0–23.0) |  |  |  |  |
| HADS-D – Emotion-focused coping | Normal | 62 | 25.0 (24.0–28.0) | KW χ²(2)=5.375 | 0.066 | ε² = 0.058 |  |
|  | Borderline | 22 | 24.0 (22.0–26.0) |  |  |  |  |
|  | Abnormal | 9 | 24.0 (20.75–25.25) |  |  |  |  |
| HADS-D – Problem-focused coping | Normal | 62 | 28.5 (27.0–32.0) | KW χ²(2)=5.081 | 0.076 | ε² = 0.055 |  |
|  | Borderline | 22 | 28.0 (26.0–29.0) |  |  |  |  |
|  | Abnormal | 9 | 27.0 (25.75–27.5) |  |  |  |  |
| CAT – Avoidant coping | Medium impact | 36 | 20.0 (18.0–21.0) | KW χ²(2)=5.067 | 0.075 | ε² = 0.054 |  |
|  | High impact | 47 | 21.0 (19.25–22.0) |  |  |  |  |
|  | Very high impact | 10 | 20.5 (18.0–23.0) |  |  |  |  |
| CAT – Emotion-focused coping | Medium impact | 36 | 26.31 ± 2.58 | F(2,90)=7.405 | 0.001 | η² = 0.141 | Medium > High |
|  | High impact | 47 | 24.13 ± 2.46 |  |  |  |  |
|  | Very high impact | 10 | 24.50 ± 3.24 |  |  |  |  |
| CAT – Problem-focused coping | Medium impact | 36 | 29.0 (28.0–32.0) | KW χ²(2)=7.132 | 0.027 | ε² = 0.075 | Medium > High |
|  | High impact | 47 | 27.0 (26.0–29.0) |  |  |  |  |
|  | Very high impact | 10 | 28.5 (27.0–32.0) |  |  |  |  |
| mMRC – Avoidant coping | Moderate dyspnea | 51 | 20.0 (18.0–20.75) | KW χ²(1)=21.241 | <0.001 | ε²=0.229 | Severe > Moderate |
|  | Severe dyspnea | 42 | 21.0 (20.0–23.0) |  |  |  |  |
| mMRC – Emotion-focused coping | Moderate dyspnea | 51 | 26.12 ± 2.75 | F(1,91)=22.221 | <0.001 | η²=0.196 | Moderate > Severe |
|  | Severe dyspnea | 42 | 23.67 ± 2.14 |  |  |  |  |
| mMRC – Problem-focused coping | Moderate dyspnea | 51 | 29.73 ± 2.89 | F(1,91)=20.333 | <0.001 | η²=0.182 | Moderate > Severe |
|  | Severe dyspnea | 42 | 27.24 ± 2.31 |  |  |  |  |
| Data are presented as mean ± standard deviation (SD) or median (interquartile range, IQR) depending on variable distribution. Group comparisons across three categories (HADS-A, HADS-D, CAT) were conducted using the Kruskal–Wallis test for non-normally distributed variables and one-way ANOVA for normally distributed variables, followed by post-hoc comparisons when significant. Comparisons across two categories (mMRC) were performed using the Mann–Whitney U test or independent-samples t-test based on distribution. Effect sizes are reported as η² for ANOVA and ε² for Kruskal–Wallis tests.  HADS-A - Hospital Anxiety and Depression Scale, Anxiety subscale; HADS-D - Hospital Anxiety and Depression Scale, Depression subscale; CAT - COPD Assessment Test; mMRC - modified Medical Research Council dyspnea scale. | | | | | | | |
